# Supplementary material
Source: publisher figshare collection journal article supplement (https://sage.figshare.com/ndownloader/files/14812904)
Supplement: Supplementary file 1 [file 14812904]

## Supplemental Appendix

Supplemental Table A1: Descriptive Statistics by Ethnic Group

| Variables                       | Native<br>White | Chinese | South<br>American | West<br>Indian | Dominican | Puerto<br>Rican | Native<br>Black |
|---------------------------------|-----------------|---------|-------------------|----------------|-----------|-----------------|-----------------|
| Age                             | 25.81           | 22.75   | 24.09             | 23.26          | 23.85     | 24.20           | 25.54           |
| Female                          | 54.60           | 44.84   | 46.83             | 45.83          | 59.44     | 59.37           | 61.42           |
| M's education, no high school   | 10.89           | 40.48   | 38.38             | 22.79          | 55.99     | 46.86           | 27.92           |
| M's education, high school      | 30.21           | 32.76   | 35.98             | 30.60          | 20.50     | 30.34           | 31.87           |
| M's education, some college     | 16.84           | 6.38    | 14.61             | 20.44          | 17.62     | 13.39           | 22.23           |
| M's education, college graduate | 23.84           | 13.18   | 8.30              | 20.80          | 4.96      | 7.30            | 13.35           |
| M's education, graduate degree  | 18.22           | 7.19    | 2.73              | 5.37           | 0.94      | 2.12            | 4.63            |
| F's education, no high school   | 23.88           | 43.31   | 39.33             | 48.98          | 60.90     | 58.85           | 54.68           |
| F's education, high school      | 21.76           | 25.00   | 29.56             | 24.03          | 18.35     | 25.08           | 23.83           |
| F's education, some college     | 10.64           | 8.20    | 15.83             | 10.94          | 9.99      | 9.10            | 10.42           |
| F's education, college graduate | 20.32           | 12.54   | 12.19             | 12.47          | 8.05      | 3.89            | 7.48            |
| F's education, graduate degree  | 23.40           | 10.96   | 3.10              | 3.58           | 2.71      | 3.08            | 3.60            |
| Mother worked full time         | 38.93           | 54.54   | 52.39             | 76.84          | 49.22     | 44.45           | 64.71           |
| Father worked full time         | 85.02           | 84.00   | 80.52             | 70.84          | 76.91     | 72.01           | 65.30           |
| Female-headed household         | 9.89            | 5.47    | 15.05             | 19.18          | 17.69     | 22.39           | 25.38           |
| R's education, no high school   | 6.79            | 5.36    | 10.12             | 15.92          | 19.22     | 29.49           | 20.86           |
| R's education, high school      | 9.94            | 2.02    | 13.66             | 13.18          | 12.93     | 19.37           | 20.02           |
| R's education, some college     | 28.92           | 52.62   | 59.65             | 56.07          | 53.79     | 40.07           | 45.13           |
| R's education, college graduate | 54.35           | 40.01   | 16.57             | 14.83          | 14.06     | 11.07           | 13.99           |
| R's income, no response         | 22.40           | 17.33   | 16.92             | 22.77          | 15.79     | 22.98           | 25.91           |
| R's income, less than \$8,000   | 19.93           | 43.32   | 26.60             | 33.60          | 31.84     | 30.13           | 27.97           |
| R's income, \$8,000-\$19,999    | 15.62           | 10.58   | 17.37             | 12.97          | 17.98     | 16.09           | 14.76           |
| R's income, \$20,000-\$29,999   | 12.09           | 8.69    | 15.37             | 13.56          | 13.76     | 14.23           | 13.29           |
| R's income, \$30,000-\$49,999   | 18.44           | 12.44   | 15.86             | 11.62          | 17.67     | 12.47           | 12.84           |
| R's income, more than \$50,000  | 11.52           | 7.64    | 7.88              | 5.48           | 2.97      | 4.11            | 5.24            |
| Own vs. rent                    | 18.36           | 32.24   | 22.58             | 25.60          | 10.38     | 10.10           | 12.10           |
| Grew up in housing project      | 0.50            | 6.62    | 3.78              | 4.95           | 8.33      | 16.08           | 16.64           |
| Times moved between 6 and 18    | 1.91            | 1.46    | 1.58              | 1.76           | 2.22      | 2.03            | 2.20            |
| Years in current neighborhood   | 5.82            | 11.99   | 10.24             | 9.59           | 9.33      | 8.72            | 8.13            |
| Currently live with parents     | 24.51           | 66.57   | 52.38             | 59.28          | 45.55     | 42.68           | 33.61           |
| Grew up outside NY MSA          | 36.43           | 8.75    | 5.43              | 2.15           | 0.34      | 1.72            | 8.57            |

Source: Geocoded ISGMNY (2000).

Notes: Figures for continuous variables are means. Figures for categorical variables are percentages.

Supplemental Table A2: Characteristics of Respondent's Birth, Childhood and Adult Neighborhoods

|                                   | Birth Neighborhood |      | Childhood Neighborhood |      | Adult Neighborhood |      |
|-----------------------------------|--------------------|------|------------------------|------|--------------------|------|
|                                   | Mean               | SD   | Mean                   | SD   | Mean               | SD   |
| <i>Mean Household Income</i>      |                    |      |                        |      |                    |      |
| Native white                      | 52.53              | 23.7 | 58.37                  | 28.1 | 77.41              | 47.4 |
| Grew up outside NY metro          | 48.64              | 28.9 | 65.45                  | 35.3 | 86.13              | 55.3 |
| Grew up within NY metro           | 52.90              | 23.1 | 54.74                  | 22.7 | 71.56              | 40.1 |
| Chinese                           | 45.86              | 16.3 | 43.8                   | 19.3 | 56.43              | 27.0 |
| South American                    | 45.21              | 14.5 | 37.86                  | 13.1 | 51.19              | 15.9 |
| West Indian                       | 41.25              | 16.6 | 39.91                  | 12.2 | 51.93              | 28.2 |
| Dominican                         | 38.35              | 15.8 | 33.91                  | 11.8 | 44.57              | 15.2 |
| Puerto Rican                      | 36.49              | 19.1 | 30.97                  | 13.7 | 44.92              | 38.9 |
| Native black                      | 37.33              | 15.0 | 34.12                  | 17.1 | 41.08              | 19.8 |
| <i>Percent Non-Hispanic White</i> |                    |      |                        |      |                    |      |
| Native white                      | 88.28              | 22.6 | 80.49                  | 23.5 | 64.06              | 21.9 |
| Grew up outside NY metro          | 75.46              | 37.0 | 83.56                  | 22.4 | 67.66              | 19.1 |
| Grew up within NY metro           | 89.51              | 20.3 | 78.92                  | 23.9 | 61.64              | 23.4 |
| Chinese                           | 72.79              | 29.4 | 50.09                  | 31.9 | 40.51              | 26.7 |
| South American                    | 82.55              | 24.4 | 40.93                  | 26.6 | 35.23              | 24.9 |
| West Indian                       | 45.58              | 31.7 | 22.62                  | 23.2 | 16.08              | 23.1 |
| Dominican                         | 72.25              | 27.1 | 34.68                  | 28.1 | 20.57              | 22.6 |
| Puerto Rican                      | 69.98              | 27.1 | 31.79                  | 32.6 | 23.25              | 25.4 |
| Native black                      | 42.29              | 33.2 | 20.89                  | 28.6 | 11.71              | 19.1 |
| N                                 | 1,062              |      | 1,062                  |      | 1,062              |      |

Source: Geocoded ISGMNY (2000).

Notes: Figures reported are mean values for each variable. Characteristics of census tracts are interpolated for respondent's birth, childhood and current neighborhoods. Neighborhood average household income is measured in \$1,000.

Supplemental Table A3: Change Score Models of Neighborhood Attainment from Birth to Adulthood

| VARIABLES                          | Income<br>Model 1   | Income<br>Model 2    | % White<br>Model 3   | % White<br>Model 4   |
|------------------------------------|---------------------|----------------------|----------------------|----------------------|
| Chinese                            | -14.94**<br>(5.529) | -19.63***<br>(4.988) | -9.687<br>(5.232)    | -17.45***<br>(3.375) |
| South American                     | -11.29**<br>(4.243) | -15.37***<br>(3.540) | -13.23**<br>(4.039)  | -12.06***<br>(2.857) |
| West Indian                        | -7.23<br>(5.789)    | -15.06**<br>(4.984)  | -10.48*<br>(5.07)    | -40.63***<br>(3.381) |
| Dominican                          | -11.92**<br>(4.374) | -19.75***<br>(3.507) | -16.21***<br>(4.622) | -25.24***<br>(2.851) |
| Puerto Rican                       | -4.077<br>(6.176)   | -12.24*<br>(5.920)   | -11.64**<br>(3.995)  | -21.78***<br>(2.670) |
| Native black                       | -12.26**<br>(4.499) | -21.04***<br>(3.754) | -7.269<br>(4.194)    | -40.53***<br>(2.640) |
| Age                                | 1.340<br>(.832)     | 1.146<br>(.775)      | -0.355<br>(0.597)    | .676*<br>(.344)      |
| Female                             | 3.084<br>(3.520)    | 1.994<br>(3.170)     | -3.283<br>(2.710)    | -3.050<br>(1.582)    |
| Own vs. rent                       | -4.430<br>(3.639)   | -3.854<br>(2.964)    | 0.933<br>(3.665)     | .134<br>(2.128)      |
| Grew up in housing project         | -10.91**<br>(3.513) | -11.56***<br>(2.832) | -2.077<br>(4.979)    | -4.919*<br>(2.187)   |
| Times moved between ages 6-18      | -.853<br>(.516)     | -.924*<br>(.454)     | -0.362<br>(0.468)    | -.266<br>(.260)      |
| Years in current neighborhood      | -.386<br>(.228)     | -.329<br>(.193)      | -0.207<br>(0.142)    | -.283***<br>(.081)   |
| Living with parents                | 3.732<br>(6.405)    | 1.877<br>(5.840)     | -3.665<br>(3.437)    | -2.692<br>(1.933)    |
| Grew up within NYMSA               | 23.50**<br>(8.111)  | 11.93<br>(8.102)     | 24.52***<br>(4.507)  | 6.207*<br>(2.505)    |
| Birth neighborhood characteristics | -                   | -.001***<br>(.000)   | -                    | -93.74***<br>(2.417) |
| Constant                           | -19.34<br>(22.9)    | 22.25<br>(22.50)     | -4.93<br>(17.24)     | 44.72***<br>(9.786)  |
| R-squared                          | .187                | .347                 | .168                 | .725                 |
| N (individuals)                    | 1,025               | 1,025                | 1,025                | 1,025                |

Source: Geocoded ISGMNY (2000).

Notes: 1. Birth neighborhood characteristics refer to neighborhood mean household income (in Models 1-2) and to neighborhood white composition (in Models 3-4). 2. All models controlled for parental background and respondent's socioeconomic attainment (results not shown, but available upon request). \*p<.05; \*\*p<.01; \*\*\*p<.001

Supplemental Table A4: Predictors of Neighborhood Attainment (Respondents Who Left Parental Home)

| VARIABLES                             | Income      |       | % White     |       |
|---------------------------------------|-------------|-------|-------------|-------|
|                                       | Coefficient | SE    | Coefficient | SE    |
| Chinese                               | -7.626**    | 2.795 | -16.410***  | 3.563 |
| South American                        | -11.531***  | 1.999 | -18.328***  | 2.505 |
| West Indian                           | -13.925***  | 2.303 | -40.820***  | 2.796 |
| Dominican                             | -13.676***  | 1.961 | -27.454***  | 2.492 |
| Puerto Rican                          | -13.765***  | 1.870 | -25.286***  | 2.439 |
| Native black                          | -14.501***  | 1.857 | -40.969***  | 1.994 |
| Age                                   | .862***     | .082  | -1.209***   | .069  |
| Female                                | -1.296      | 1.162 | -1.793      | 1.317 |
| M's education, high school            | .846        | 1.297 | -.953       | 1.763 |
| M's education, some college           | -1.132      | 1.586 | -2.382      | 2.138 |
| M's education, college graduate       | 1.485       | 2.125 | -1.202      | 2.373 |
| M's education, graduate degree        | 3.153       | 2.585 | 2.154       | 3.127 |
| F's education, high school            | 1.918       | 1.291 | 3.701*      | 1.834 |
| F's education, some college           | .058        | 1.716 | 4.069       | 2.332 |
| F's education, college graduate       | 7.125**     | 2.343 | 5.352*      | 2.382 |
| F's education, graduate degree        | 11.220***   | 2.992 | 5.438*      | 2.596 |
| Mother worked full time               | .864        | 1.141 | .484        | 1.301 |
| Father worked full time               | 1.118       | 1.361 | 2.905       | 1.756 |
| Female-headed household               | .808        | 1.354 | -.037       | 1.969 |
| R's education, high school            | 3.018       | 1.764 | .882        | 2.337 |
| R's education, some college           | 2.743*      | 1.296 | -.164       | 2.001 |
| R's education, college graduate       | 6.228***    | 1.669 | 4.592       | 2.571 |
| R's income, less than \$8,000         | 4.025       | 2.139 | -4.702*     | 2.099 |
| R's income, \$8,000-\$19,999          | .611        | 1.809 | -4.628*     | 2.236 |
| R's income, \$20,000-\$29,999         | 2.725       | 1.511 | -3.067      | 2.085 |
| R's income, \$30,000-\$49,999         | 1.581       | 1.554 | .133        | 1.992 |
| R's income, more than \$50,000        | 3.409       | 2.062 | 3.334       | 2.547 |
| Own vs. rent                          | 1.077       | 1.436 | 2.285       | 1.784 |
| Grew up in housing project            | -3.143      | 1.673 | -7.100**    | 2.196 |
| Times moved between 6 and 18          | -.155       | .176  | -.133       | .229  |
| Years in current neighborhood         | -.028       | .076  | -.131       | .111  |
| Grew up within NYMSA                  | -4.985*     | 2.278 | -.653       | 1.999 |
| Constant                              | 52.926***   | 2.628 | 59.841      | 3.230 |
| Mean rate of change, $\sigma^2_1$     | 4.629***    | .239  | 1.591***    | .073  |
| Mean initial level, $\sigma^2_0$      | 602.395***  | 3.107 | 133.344***  | .719  |
| Within-person, $\sigma^2_\varepsilon$ | 193.814***  | .655  | 561.929***  | .591  |
| Average RVI                           | .033        |       | .028        |       |
| Largest FMI                           | .067        |       | .045        |       |
| N (observations)                      | 2,526       |       | 2,526       |       |

|                 |     |     |
|-----------------|-----|-----|
| N (respondents) | 842 | 842 |
|-----------------|-----|-----|

---

Source: Geocoded ISGMNY (2000).  
Notes: \*p<.05; \*\*p<.01; \*\*\*p<.001
